# Supplementary material
Source: PubMed Central journal article supplement (PMC2992871)
Supplement: NIHMS234511-supplement-1.pdf [file NIHMS234511-supplement-1.pdf]

**Genome-wide analysis of novel splice variants induced by topoisomerase I poisoning  
shows preferential occurrence in genes encoding splicing factors**

Stéphanie Solier<sup>1</sup>, Jennifer Barb<sup>2</sup>, Barry R. Zeeberg<sup>1</sup>, Sudhir Varma<sup>1</sup>, Mike C Ryan<sup>1</sup>, Kurt  
W. Kohn<sup>1</sup>, John N. Weinstein<sup>1</sup>, Peter J. Munson<sup>2</sup> and Yves Pommier<sup>1\*</sup>

*<sup>1</sup>Laboratory of Molecular Pharmacology, Center for Cancer Research,  
National Cancer Institute, Bethesda, Maryland.*

*<sup>2</sup>Mathematical and Statistical Computing Laboratory, Division of Computational  
Bioscience, Center for Information Technology, National Institutes of Health, Bethesda,  
Maryland.*

**Supplementary Material**

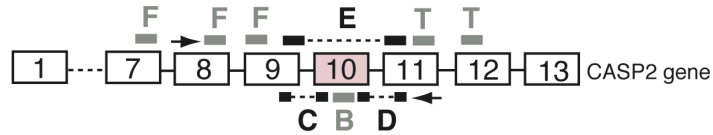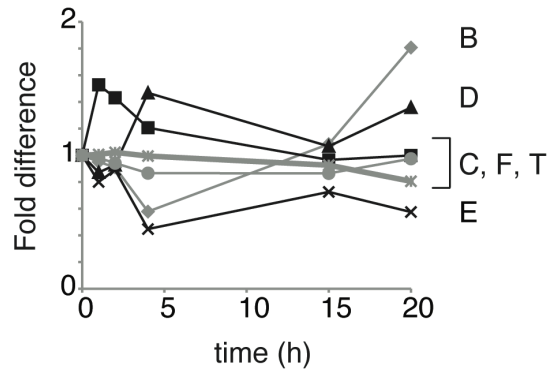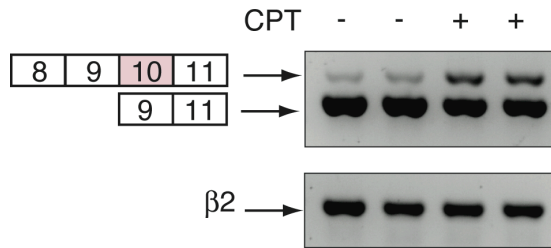

**Supplemental Figure 1. Validation of the ExonHit results in HCT116 cells treated with CPT (10  $\mu$ M, 20 h): example of the caspase-2 gene.**

Upper panel: schematic gene representation and position of the ExonHit probes (B, C, D, E, F, T) and of the primers used for the RT-PCR (black arrows). Middle panel: fold difference for each of the probes depending on CPT treatment normalized to the untreated controls. Lower panel: RT-PCR showing the effect of CPT on exon 10 inclusion. Caspase-2 mRNA was analyzed by RT-PCR using CASP2 E8s and CASP2 E11as primers. Controls cells received vehicle (DMSO) alone.  $\beta$ 2 microglobulin ( $\beta$ 2) mRNA was used as a standardizing control.

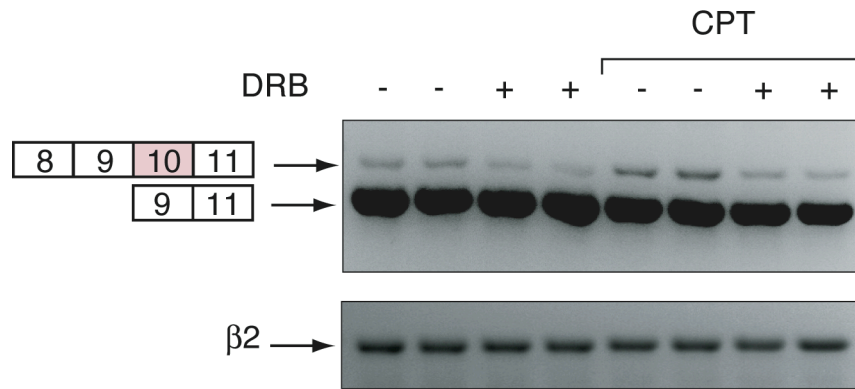

**Supplemental Figure 2. The CDK inhibitor, 5, 6-Dichloro- $\beta$ -D ribofuranosyl benzimidazole (DRB) suppresses the effect of CPT on the alternative splicing of caspase-2.**

HCT116 cells were pretreated with DRB (100  $\mu$ M, 1 h) prior treatment by CPT (10  $\mu$ M, 2 h). Caspase-2 splicing was analyzed by RT-PCR using CASP2 E8s and CASP2 E11as primers. Controls cells received vehicle (DMSO) alone.  $\beta 2$  microglobulin ( $\beta 2$ ) mRNA was used as a standardizing control.

**Supplemental Table 1. List of primers**

| <b>oligonucleotide name</b> | <b>sequence (5' to 3')</b>  |
|-----------------------------|-----------------------------|
| AASDHPPT E4s                | AAAAGCCATTGGTGTGGAC         |
| AASDHPPT E6as               | CTGGGTTGGTTTGAATCAT         |
| APTX E3s                    | CAGCGAATCAGACTTCCACA        |
| APTX E6as                   | TGGGGTCCTGCATAGAAATC        |
| BAT1 E2s                    | CTCTGGCTTTCGTGACTTCC        |
| BAT1 E6as                   | GGGCAGTTCTTCTTCAGCAC        |
| CASP2 E8s                   | GTTACCTGCACACCGAGTCACG      |
| CASP2 E11as                 | GCGTGGTTCTTTCCATCTTGTTGGTCA |
| CCT2 E6s                    | GTTGGAGAGAAGCCACGAAG        |
| CCT2 E8as                   | GCATTTTCAATTCGTTTTGG        |
| DDX17 E7s                   | CCCAGATTCGAGACTTGGAA        |
| DDX17 E9as                  | ATGTTGTGGTTGGCACTCAA        |
| EIF2S2 E2s                  | CCCAGCCTTCAGAAACAAAA        |
| EIF2S2 E6as                 | TTCTCCCCAGCAACCATATC        |
| PNN E4s                     | AGAAGAGAATCACGCCAGGA        |
| PNN E7as                    | CCGCTTTTGCCTTTCAGTAG        |
| PPFIA1 E9s                  | CAGAGCAAAAGCTGCAACAG        |
| PPFIA1 E11as                | TCTTCCAAAGCAGCCATTCT        |
| PSMD12 E1s                  | CGTCAAGATGGAGGTGGACT        |
| PSMD12 E6as                 | GCCTTCGGTAACCATTTCGTA       |
| RBM8A E2s                   | GATTATGACAGCGTGGAGCA        |
| RBM8A E4as                  | GTCTCCGGTCTGGACTTCTG        |
| RIOK1 E7s                   | CACAGCAAATGGAGAGAGCA        |
| RIOK1 E8-9as                | CAGGCATGTCATCTTTACCG        |
| RTN4 E13s                   | CATTTCACTCTTCAGTGTTCCCTG    |
| RTN4 E15as                  | CTGACCCTCCCCGTATAAT         |
| SF1 E3s                     | ATCCCCCTGGACTTACTCG         |
| SF1 E6as                    | ACTCACACGTGTTGCTGGAG        |
| TCP1 E3s                    | GGTGCAACCATCCTGAAGTT        |
| TCP1 E8as                   | GGCAAGCAATTTTTGCATTT        |
| WHSC1 E23s                  | CACACGAGAACGACATCACC        |
| WHSC1 E25as                 | CTATCCCCGAGGAATCCACT        |
| ZRANB2 E3s                  | GAGCCGAGGCCTATTTAGTG        |
| ZRANB2 E6as                 | GACCAACTGCTTTCCTCTG         |

## Supplemental Table 2. HTGM parameters

| Parameter               | Value                         |
|-------------------------|-------------------------------|
| GoMiner Build           | 312                           |
| GO Database Build       | September, 2009               |
| Data Source             | UniProtKB                     |
| Organism                | <i>H. sapiens</i>             |
| LookupSettings          | none enabled                  |
| Evidence Codes          | Level 1                       |
| FDR Randomizations      | 100                           |
| FDR & p-value Threshold | 0.10                          |
| Root Category           | GO:0008150 biological_process |
| Min Category Size       | 5                             |

HTGM served a dual purpose. (1) First, to provide quality assurance we validate that the majority of the candidate alternatively spliced genes coherently focus into a small number of specific GO categories. We have higher confidence in a group of candidate alternatively spliced genes that all map to the same significant category in contrast to an “isolated” candidate alternatively spliced gene. We can readily assess those alternatively spliced candidate genes meeting the quality assurance criteria *vis a vis* the GO categories that they map to. (2) The second purpose is to select the significant categories and the genes of interest mapping to them.

Supplemental Table 3. List of the genes with a significance index (SI) of 6 or greater.

| Gene            | SI         |
|-----------------|------------|
| <i>AASDHPPT</i> | 17.959539  |
| <i>AASS</i>     | 6.2724678  |
| <i>ABCA8</i>    | 11.2226934 |
| <i>ABCC9</i>    | 9.09602522 |
| <i>ABCF3</i>    | 8.59826277 |
| <i>ABCG2</i>    | 6.05348611 |
| <i>ABHD12B</i>  | 7.57391441 |
| <i>ABHD3</i>    | 6.21554399 |
| <i>ABI3BP</i>   | 10.5771143 |
| <i>ABTB2</i>    | 6.47074745 |
| <i>ACACA</i>    | 6.28951569 |
| <i>ACACB</i>    | 6.37658455 |
| <i>ACAT2</i>    | 6.91444144 |
| <i>ACINI</i>    | 7.34676388 |
| <i>ACLY</i>     | 8.89176111 |
| <i>ACSL5</i>    | 7.31508938 |
| <i>ACTR3B</i>   | 6.08714405 |
| <i>ADAM19</i>   | 10.286135  |
| <i>ADAMTS14</i> | 8.64715723 |
| <i>ADAMTS17</i> | 8.45209472 |
| <i>ADAMTS6</i>  | 6.61984895 |
| <i>ADCY6</i>    | 10.8122553 |
| <i>ADD2</i>     | 9.10765289 |
| <i>AFAP1</i>    | 7.16055966 |
| <i>AFF4</i>     | 7.92680845 |
| <i>AGPAT1</i>   | 6.34941811 |
| <i>AHR</i>      | 9.10507706 |
| <i>AKR1A1</i>   | 9.47850168 |
| <i>ALDH1A3</i>  | 7.43065612 |
| <i>ALDH7A1</i>  | 6.08144241 |
| <i>ALS2</i>     | 6.75848169 |
| <i>ALS2CR7</i>  | 12.0299352 |
| <i>AMBP</i>     | 10.1401724 |
| <i>AMOT</i>     | 9.65360758 |
| <i>AMPD3</i>    | 7.32663081 |
| <i>ANAPC11</i>  | 8.03063519 |
| <i>ANK3</i>     | 11.6946264 |
| <i>ANKFN1</i>   | 7.94663138 |
| <i>ANKRD11</i>  | 8.00572247 |
| <i>ANKRD5</i>   | 12.5518866 |

|                 |            |
|-----------------|------------|
| <i>ANXA1</i>    | 14.4190682 |
| <i>ANXA2</i>    | 9.69705406 |
| <i>ANXA6</i>    | 6.2217634  |
| <i>APIG2</i>    | 9.85953433 |
| <i>APIGBP1</i>  | 7.51839295 |
| <i>AP2A2</i>    | 7.46020499 |
| <i>AP4M1</i>    | 7.24173122 |
| <i>APAF1</i>    | 6.70574833 |
| <i>APEX1</i>    | 12.2394718 |
| <i>APITD1</i>   | 7.70315353 |
| <i>APOB48R</i>  | 7.37051027 |
| <i>APPL1</i>    | 8.61695445 |
| <i>APTX</i>     | 18.2554202 |
| <i>AQP7</i>     | 10.2212222 |
| <i>AQP9</i>     | 13.4015721 |
| <i>ARAF</i>     | 6.70339157 |
| <i>ARHGEF19</i> | 13.7866532 |
| <i>ARHGEF5</i>  | 10.7742084 |
| <i>ARID1B</i>   | 16.2893232 |
| <i>ARID3B</i>   | 6.64415975 |
| <i>ARID4A</i>   | 6.80276338 |
| <i>ARMC3</i>    | 8.84266045 |
| <i>ARMC9</i>    | 6.73923896 |
| <i>ARMCX3</i>   | 6.40464553 |
| <i>ARNT2</i>    | 6.96153413 |
| <i>ARRB1</i>    | 6.27989526 |
| <i>ASAH2</i>    | 6.407854   |
| <i>ASCC2</i>    | 6.56724365 |
| <i>ASL</i>      | 6.57218178 |
| <i>ASS1</i>     | 6.48177633 |
| <i>ASTL</i>     | 8.87137478 |
| <i>ATG9A</i>    | 10.9048997 |
| <i>ATM</i>      | 10.9399978 |
| <i>ATP10D</i>   | 6.20831774 |
| <i>ATP5A1</i>   | 6.35257871 |
| <i>ATP6V0A2</i> | 10.9166983 |
| <i>ATP8B2</i>   | 8.08795663 |
| <i>ATPBD4</i>   | 7.44380604 |
| <i>ATXN2L</i>   | 7.94624854 |
| <i>AUP1</i>     | 6.27590402 |
| <i>B3GALNT1</i> | 11.7963957 |
| <i>B4GALNT1</i> | 7.24034342 |
| <i>B4GALT3</i>  | 6.27990296 |
| <i>BARX2</i>    | 6.83895792 |
| <i>BAT1</i>     | 6.43187807 |

|                  |            |
|------------------|------------|
| <i>BAT2</i>      | 9.15986858 |
| <i>BAZ2A</i>     | 7.6266616  |
| <i>BCCIP</i>     | 17.0881438 |
| <i>BCL2L12</i>   | 6.57163026 |
| <i>BCL2L13</i>   | 6.88031815 |
| <i>BCL9</i>      | 8.25284027 |
| <i>BET1</i>      | 6.76570711 |
| <i>BIN1</i>      | 12.2759009 |
| <i>BMS1</i>      | 13.4092797 |
| <i>BNIP3</i>     | 6.66066412 |
| <i>BPIL2</i>     | 6.13679792 |
| <i>BRAP</i>      | 7.01244487 |
| <i>BRD3</i>      | 7.74113156 |
| <i>BRD8</i>      | 6.89153611 |
| <i>BTBD10</i>    | 10.5506637 |
| <i>BUB1B</i>     | 7.04737555 |
| <i>BXDC2</i>     | 9.65138104 |
| <i>C10orf118</i> | 8.64524433 |
| <i>C10orf137</i> | 12.790085  |
| <i>C10orf64</i>  | 12.126907  |
| <i>C10orf91</i>  | 6.67742341 |
| <i>C10orf92</i>  | 6.05338786 |
| <i>C11orf48</i>  | 8.66988185 |
| <i>C11orf75</i>  | 6.23394441 |
| <i>C12orf48</i>  | 6.48352428 |
| <i>C14orf133</i> | 7.02262679 |
| <i>C14orf43</i>  | 6.94864347 |
| <i>C14orf68</i>  | 7.51179304 |
| <i>C17orf55</i>  | 6.14719364 |
| <i>C17orf63</i>  | 8.67692699 |
| <i>C17orf68</i>  | 6.49043059 |
| <i>C19orf22</i>  | 7.98234794 |
| <i>C1orf103</i>  | 6.68817513 |
| <i>C1orf112</i>  | 9.10160418 |
| <i>C1orf125</i>  | 7.45790571 |
| <i>C1orf19</i>   | 7.12280751 |
| <i>C1orf52</i>   | 12.9135781 |
| <i>C1orf77</i>   | 14.2905983 |
| <i>C20orf117</i> | 7.53928234 |
| <i>C20orf74</i>  | 16.536651  |
| <i>C22orf30</i>  | 6.43127335 |
| <i>C2orf50</i>   | 7.96756257 |
| <i>C3orf19</i>   | 7.96315407 |
| <i>C4orf20</i>   | 6.61451004 |
| <i>C4orf28</i>   | 6.32411419 |



|                 |            |
|-----------------|------------|
| <i>C4orf29</i>  | 7.94332361 |
| <i>C5orf5</i>   | 18.9016595 |
| <i>C6orf107</i> | 6.14842852 |
| <i>CABIN1</i>   | 9.93803087 |
| <i>CAD</i>      | 11.0527865 |
| <i>CALB2</i>    | 6.30472455 |
| <i>CAMK2G</i>   | 8.05351082 |
| <i>CAP2</i>     | 6.35762724 |
| <i>CARM1</i>    | 6.70747593 |
| <i>CARS</i>     | 6.39747509 |
| <i>CASC3</i>    | 10.6031649 |
| <i>CASP7</i>    | 7.79082832 |
| <i>CBLC</i>     | 12.7575358 |
| <i>CBWD5</i>    | 7.55822038 |
| <i>CC2D1B</i>   | 9.73817879 |
| <i>CCAR1</i>    | 6.67331965 |
| <i>CCDC110</i>  | 17.3736632 |
| <i>CCDC144B</i> | 8.00046373 |
| <i>CCDC46</i>   | 11.0858302 |
| <i>CCDC47</i>   | 15.2051217 |
| <i>CCDC74A</i>  | 6.03091474 |
| <i>CCDC75</i>   | 6.13745566 |
| <i>CCDC77</i>   | 17.1989042 |
| <i>CCDC84</i>   | 7.67107374 |
| <i>CCM2</i>     | 6.2851178  |
| <i>CCNB2</i>    | 7.18076426 |
| <i>CCNG1</i>    | 8.48692429 |
| <i>CCNJ</i>     | 6.84580197 |
| <i>CCNK</i>     | 9.13714533 |
| <i>CCR7</i>     | 6.84968476 |
| <i>CCRK</i>     | 6.17290803 |
| <i>CCT2</i>     | 17.538741  |
| <i>CCT8</i>     | 8.03550978 |
| <i>CD109</i>    | 6.05852761 |
| <i>CD207</i>    | 7.21660262 |
| <i>CD276</i>    | 6.60756171 |
| <i>CD3D</i>     | 6.00527146 |
| <i>CD53</i>     | 9.0574579  |
| <i>CD97</i>     | 9.06690312 |
| <i>CDC123</i>   | 8.60797978 |
| <i>CDC14A</i>   | 8.7780135  |
| <i>CDC20</i>    | 6.48857509 |
| <i>CDC20B</i>   | 6.25386104 |
| <i>CDC2L1</i>   | 8.0364282  |
| <i>CDH3</i>     | 6.92272429 |

|                 |            |
|-----------------|------------|
| <i>CDK5RAP1</i> | 8.35925182 |
| <i>CDYL</i>     | 6.27837365 |
| <i>CENPP</i>    | 7.93520588 |
| <i>CENPT</i>    | 8.70567326 |
| <i>CENTD2</i>   | 6.06001504 |
| <i>CENTG1</i>   | 7.10782373 |
| <i>CEP110</i>   | 6.61481243 |
| <i>CEP250</i>   | 16.225372  |
| <i>CEP76</i>    | 8.66793934 |
| <i>CHD1L</i>    | 6.29324642 |
| <i>CHD2</i>     | 8.25014204 |
| <i>CHD6</i>     | 6.21925812 |
| <i>CHMP6</i>    | 7.17195359 |
| <i>CHRNA6</i>   | 7.5361628  |
| <i>CLCN6</i>    | 8.48701761 |
| <i>CLEC16A</i>  | 10.1067823 |
| <i>CLK1</i>     | 14.8365318 |
| <i>CLPTM1</i>   | 9.03693247 |
| <i>CNOT3</i>    | 6.38710545 |
| <i>CNTN5</i>    | 6.67271829 |
| <i>CNTNAP3</i>  | 8.30835547 |
| <i>CNTROB</i>   | 6.62948845 |
| <i>COASY</i>    | 7.86892514 |
| <i>COG1</i>     | 7.27543032 |
| <i>COG2</i>     | 7.52258405 |
| <i>COG4</i>     | 6.88895086 |
| <i>COL12A1</i>  | 6.44514948 |
| <i>COL13A1</i>  | 6.76125055 |
| <i>COL4A5</i>   | 12.6838807 |
| <i>COMMD3</i>   | 6.09119876 |
| <i>COPB2</i>    | 9.28166704 |
| <i>COPS4</i>    | 6.72241586 |
| <i>COPS7B</i>   | 7.0450535  |
| <i>COX5A</i>    | 6.86544425 |
| <i>COX7A1</i>   | 8.56806091 |
| <i>CPA1</i>     | 6.19238605 |
| <i>CPNE1</i>    | 6.95499505 |
| <i>CRNKL1</i>   | 8.55204492 |
| <i>CSNK1A1</i>  | 6.63844677 |
| <i>CSNK1G3</i>  | 6.25838882 |
| <i>CUEDC1</i>   | 8.74909389 |
| <i>CUTL1</i>    | 6.27235385 |
| <i>CXorf56</i>  | 9.69126919 |
| <i>CYCS</i>     | 11.1892252 |
| <i>CYP20A1</i>  | 13.2878012 |

|                |            |
|----------------|------------|
| <i>CYP24A1</i> | 6.10114188 |
| <i>DACT1</i>   | 6.28389113 |
| <i>DAPK1</i>   | 7.6449489  |
| <i>DBN1</i>    | 9.31049445 |
| <i>DCBLD1</i>  | 12.0282004 |
| <i>DCTN2</i>   | 10.902369  |
| <i>DCTN4</i>   | 6.06848768 |
| <i>DCUN1D1</i> | 8.19649205 |
| <i>DDB1</i>    | 7.13580971 |
| <i>DDB2</i>    | 6.70339344 |
| <i>DDX1</i>    | 8.02399318 |
| <i>DDX11</i>   | 8.00862614 |
| <i>DDX17</i>   | 17.8533125 |
| <i>DDX25</i>   | 7.20284405 |
| <i>DDX27</i>   | 13.3413832 |
| <i>DDX3Y</i>   | 6.59925254 |
| <i>DDX47</i>   | 6.44964547 |
| <i>DDX56</i>   | 8.23498067 |
| <i>DENND1B</i> | 7.04805848 |
| <i>DENND2D</i> | 6.19945683 |
| <i>DENND4B</i> | 13.4637155 |
| <i>DENND4C</i> | 11.5068948 |
| <i>DGKG</i>    | 10.6276607 |
| <i>DHX33</i>   | 6.1042646  |
| <i>DHX37</i>   | 7.24335563 |
| <i>DIP2A</i>   | 7.64674482 |
| <i>DIP2B</i>   | 6.47963149 |
| <i>DIP2C</i>   | 7.85390812 |
| <i>DIS3L2</i>  | 6.60591386 |
| <i>DLG3</i>    | 7.91440056 |
| <i>DLST</i>    | 7.73844971 |
| <i>DMXL2</i>   | 7.92111347 |
| <i>DNAJA3</i>  | 6.26160792 |
| <i>DNAJC19</i> | 7.38776168 |
| <i>DNAJC7</i>  | 7.38168521 |
| <i>DNAJC9</i>  | 6.76163024 |
| <i>DNMT1</i>   | 10.8863226 |
| <i>DNMT3A</i>  | 11.6734956 |
| <i>DOCK5</i>   | 6.15379429 |
| <i>DPF3</i>    | 6.59140146 |
| <i>DPP7</i>    | 8.37746219 |
| <i>DRG1</i>    | 6.61250153 |
| <i>DSCR3</i>   | 9.5060451  |
| <i>DSE</i>     | 6.51286462 |
| <i>DSG3</i>    | 10.2510895 |

|                         |            |
|-------------------------|------------|
| <b><i>DULLARD</i></b>   | 7.3708787  |
| <b><i>DUS2L</i></b>     | 8.51871639 |
| <b><i>DUT</i></b>       | 9.92605094 |
| <b><i>DYNC1H1</i></b>   | 9.19589564 |
| <b><i>DYSF</i></b>      | 6.50616586 |
| <b><i>E2F5</i></b>      | 7.15074384 |
| <b><i>EAF1</i></b>      | 7.02117158 |
| <b><i>EBNA1BP2</i></b>  | 18.7995666 |
| <b><i>EDEM1</i></b>     | 7.52866585 |
| <b><i>EED</i></b>       | 17.2428409 |
| <b><i>EEF2K</i></b>     | 6.89475907 |
| <b><i>EFTUD2</i></b>    | 9.35200412 |
| <b><i>EGLN2</i></b>     | 9.41067961 |
| <b><i>EHMT1</i></b>     | 12.4776529 |
| <b><i>EI24</i></b>      | 7.26506477 |
| <b><i>EIF2AK4</i></b>   | 6.99523673 |
| <b><i>EIF2C2</i></b>    | 7.13172136 |
| <b><i>EIF2S2</i></b>    | 19.1675114 |
| <b><i>EIF2S3</i></b>    | 11.3236711 |
| <b><i>EIF3F</i></b>     | 7.05897972 |
| <b><i>EIF4ENIF1</i></b> | 6.83585645 |
| <b><i>EIF4G1</i></b>    | 11.8057407 |
| <b><i>EIF4G3</i></b>    | 6.8548453  |
| <b><i>ELOVL2</i></b>    | 7.2384836  |
| <b><i>ELP4</i></b>      | 11.1514435 |
| <b><i>EME1</i></b>      | 7.67706174 |
| <b><i>EML4</i></b>      | 6.12444433 |
| <b><i>EMP2</i></b>      | 6.37691195 |
| <b><i>ENO2</i></b>      | 7.5317092  |
| <b><i>ENPP2</i></b>     | 9.0794635  |
| <b><i>ENPP6</i></b>     | 8.75679368 |
| <b><i>ENTPD3</i></b>    | 9.76827602 |
| <b><i>ENTPD7</i></b>    | 8.85891556 |
| <b><i>EP400</i></b>     | 10.7133295 |
| <b><i>EPB41L4A</i></b>  | 9.9080548  |
| <b><i>EPHB4</i></b>     | 7.03228585 |
| <b><i>ERBB2</i></b>     | 13.6776869 |
| <b><i>ERCC1</i></b>     | 7.0990902  |
| <b><i>ERMP1</i></b>     | 6.66493855 |
| <b><i>EWSR1</i></b>     | 15.2930239 |
| <b><i>EXOD1</i></b>     | 15.8238755 |
| <b><i>F12</i></b>       | 6.63492489 |
| <b><i>F8</i></b>        | 7.08893695 |
| <b><i>FAM115A</i></b>   | 7.04883418 |
| <b><i>FAM120A</i></b>   | 7.43339089 |

|                 |            |
|-----------------|------------|
| <i>FAM38A</i>   | 7.38406669 |
| <i>FAM44A</i>   | 8.44112618 |
| <i>FAM49B</i>   | 10.3049799 |
| <i>FAM50A</i>   | 6.514028   |
| <i>FAM62B</i>   | 6.65679725 |
| <i>FAM65A</i>   | 8.70050455 |
| <i>FAM73A</i>   | 6.28675946 |
| <i>FAM83B</i>   | 8.47866631 |
| <i>FAM8A1</i>   | 6.50225201 |
| <i>FAM9A</i>    | 6.74685926 |
| <i>FANCA</i>    | 7.30972733 |
| <i>FARSA</i>    | 9.41007889 |
| <i>FAS</i>      | 7.98556146 |
| <i>FASN</i>     | 14.7163179 |
| <i>FAT</i>      | 7.42890846 |
| <i>FBL</i>      | 6.06243154 |
| <i>FBXL10</i>   | 6.20754309 |
| <i>FBXL11</i>   | 8.35045427 |
| <i>FBXL17</i>   | 9.70432025 |
| <i>FBXL2</i>    | 7.93705677 |
| <i>FBXO11</i>   | 11.5199182 |
| <i>FBXO22</i>   | 12.832014  |
| <i>FDPS</i>     | 8.19831947 |
| <i>FEZ1</i>     | 11.1818974 |
| <i>FEZ2</i>     | 10.5877505 |
| <i>FKBP15</i>   | 6.81508017 |
| <i>FKBP4</i>    | 6.00249998 |
| <i>FLJ10081</i> | 8.11059602 |
| <i>FLJ10781</i> | 6.12228344 |
| <i>FLJ11184</i> | 9.06030874 |
| <i>FLJ20254</i> | 9.92928502 |
| <i>FLJ21986</i> | 6.95282114 |
| <i>FLJ23356</i> | 10.2394918 |
| <i>FLJ25371</i> | 9.3841179  |
| <i>FLJ30092</i> | 15.678307  |
| <i>FLJ44048</i> | 6.21076129 |
| <i>FOXJ2</i>    | 6.38730561 |
| <i>FOXK1</i>    | 12.2605373 |
| <i>FOXR1</i>    | 9.01881232 |
| <i>FRASI</i>    | 7.61513151 |
| <i>FTSJ3</i>    | 9.78772466 |
| <i>FUBP1</i>    | 8.44258483 |
| <i>FUNDC1</i>   | 6.34926949 |
| <i>FYN</i>      | 9.86101488 |
| <i>GAK</i>      | 9.91453975 |

|                         |            |
|-------------------------|------------|
| <b><i>GALNT10</i></b>   | 6.30744625 |
| <b><i>GALNTL4</i></b>   | 8.10094207 |
| <b><i>GANAB</i></b>     | 9.73413468 |
| <b><i>GCAT</i></b>      | 7.96707847 |
| <b><i>GFPT1</i></b>     | 16.2731596 |
| <b><i>GGA3</i></b>      | 6.97698174 |
| <b><i>GGT6</i></b>      | 6.01870743 |
| <b><i>GLT8D1</i></b>    | 10.426003  |
| <b><i>GLTSCR2</i></b>   | 8.85373951 |
| <b><i>GMPPA</i></b>     | 7.98964688 |
| <b><i>GNPDA2</i></b>    | 8.70257895 |
| <b><i>GOLGA2L1</i></b>  | 8.75986121 |
| <b><i>GPKOW</i></b>     | 6.0748488  |
| <b><i>GPM6A</i></b>     | 14.8651126 |
| <b><i>GPR125</i></b>    | 7.37508121 |
| <b><i>GRHL1</i></b>     | 12.0023132 |
| <b><i>GRIN2B</i></b>    | 6.98726957 |
| <b><i>GRK6</i></b>      | 6.66633361 |
| <b><i>GTF2H3</i></b>    | 9.64498358 |
| <b><i>GTF3C1</i></b>    | 6.67766245 |
| <b><i>HAVCR1</i></b>    | 6.72251351 |
| <b><i>HCCS</i></b>      | 6.13167736 |
| <b><i>HCFC1</i></b>     | 6.6672746  |
| <b><i>HD</i></b>        | 6.56655726 |
| <b><i>HDAC3</i></b>     | 8.01896161 |
| <b><i>HDAC4</i></b>     | 6.14042025 |
| <b><i>HDAC6</i></b>     | 9.39128718 |
| <b><i>HDAC9</i></b>     | 7.18906289 |
| <b><i>HDGF</i></b>      | 6.23749208 |
| <b><i>HDGF2</i></b>     | 11.5312979 |
| <b><i>HDPY-30</i></b>   | 6.52132009 |
| <b><i>HEBP1</i></b>     | 6.97051508 |
| <b><i>HEL308</i></b>    | 7.30122819 |
| <b><i>HEPH</i></b>      | 10.5202803 |
| <b><i>HIP1</i></b>      | 7.14724932 |
| <b><i>HMGB2</i></b>     | 7.33268279 |
| <b><i>HNRNPA2B1</i></b> | 7.35146434 |
| <b><i>HNRPDL</i></b>    | 14.9597889 |
| <b><i>HNRPF</i></b>     | 6.41234811 |
| <b><i>HNRPH3</i></b>    | 10.0473516 |
| <b><i>HPS4</i></b>      | 6.48177547 |
| <b><i>HPS5</i></b>      | 6.72049333 |
| <b><i>HSPA4</i></b>     | 12.2304054 |
| <b><i>HSPA4L</i></b>    | 7.87453421 |
| <b><i>HSPA5</i></b>     | 16.4465551 |

|                  |            |
|------------------|------------|
| <i>HSPBP1</i>    | 6.26630034 |
| <i>HSPC111</i>   | 17.4995733 |
| <i>HTATIP</i>    | 7.4500206  |
| <i>IDUA</i>      | 10.7936878 |
| <i>IFIH1</i>     | 7.62486437 |
| <i>IFT20</i>     | 9.52446411 |
| <i>IGF2R</i>     | 6.82737276 |
| <i>IGFBP4</i>    | 7.61499189 |
| <i>IKBKB</i>     | 7.89763535 |
| <i>IKBKE</i>     | 10.0449949 |
| <i>IL17RB</i>    | 7.47152495 |
| <i>IL1RAPL1</i>  | 7.47859793 |
| <i>IMPACT</i>    | 6.40195169 |
| <i>INPPL1</i>    | 9.99013072 |
| <i>INTS9</i>     | 6.09539099 |
| <i>IQCE</i>      | 7.64448031 |
| <i>IQGAP2</i>    | 13.6977695 |
| <i>IQGAP3</i>    | 6.87051785 |
| <i>IQSEC2</i>    | 6.48128252 |
| <i>ITGB4</i>     | 7.63780569 |
| <i>ITGB5</i>     | 7.08327213 |
| <i>ITIH2</i>     | 6.01760574 |
| <i>ITPR1</i>     | 6.06487672 |
| <i>ITPR2</i>     | 7.97037492 |
| <i>IVD</i>       | 7.25668838 |
| <i>IWS1</i>      | 6.48154031 |
| <i>JARID1A</i>   | 6.25114284 |
| <i>JARID1C</i>   | 6.77736477 |
| <i>JARID1D</i>   | 6.84269687 |
| <i>JOSD3</i>     | 16.2239606 |
| <i>JTB</i>       | 7.0081281  |
| <i>KATNAL2</i>   | 9.32167628 |
| <i>KCNG1</i>     | 6.04124675 |
| <i>KIAA0182</i>  | 6.87068609 |
| <i>KIAA0196</i>  | 6.29447045 |
| <i>KIAA0280</i>  | 7.65432665 |
| <i>KIAA0319L</i> | 6.37150679 |
| <i>KIAA0372</i>  | 10.6732198 |
| <i>KIAA0515</i>  | 8.87969106 |
| <i>KIAA0556</i>  | 9.02065456 |
| <i>KIAA0586</i>  | 9.85652643 |
| <i>KIAA0974</i>  | 6.18675068 |
| <i>KIAA1109</i>  | 8.77276368 |
| <i>KIAA1274</i>  | 10.716347  |
| <i>KIAA1303</i>  | 14.4330063 |

|                     |            |
|---------------------|------------|
| <i>KIAA1529</i>     | 14.5811454 |
| <i>KIAA1542</i>     | 9.49700104 |
| <i>KIAA1627</i>     | 8.22112599 |
| <i>KIAA1632</i>     | 9.82447366 |
| <i>KIAA1688</i>     | 6.32864848 |
| <i>KIAA1751</i>     | 9.73249471 |
| <i>KIAA1797</i>     | 7.56396867 |
| <i>KIAA1856</i>     | 13.551489  |
| <i>KIF13B</i>       | 6.83942616 |
| <i>KIF22</i>        | 6.55724957 |
| <i>KIF24</i>        | 6.12567243 |
| <i>KIRREL2</i>      | 7.13035922 |
| <i>KLK11</i>        | 6.9184311  |
| <i>KNG1</i>         | 8.8369758  |
| <i>KPNB1</i>        | 8.58449157 |
| <i>KREMEN1</i>      | 7.36366176 |
| <i>KRI1</i>         | 6.68526165 |
| <i>LAD1</i>         | 12.0860841 |
| <i>LAMA2</i>        | 7.09857187 |
| <i>LAMB2</i>        | 11.4681068 |
| <i>LCP2</i>         | 7.33213016 |
| <i>LDLR</i>         | 7.47792693 |
| <i>LEMD2</i>        | 7.4481769  |
| <i>LENG4</i>        | 6.200381   |
| <i>LILRA3</i>       | 6.19158888 |
| <i>LIMCH1</i>       | 6.29707182 |
| <i>LIN54</i>        | 7.79782309 |
| <i>LNX1</i>         | 6.2715321  |
| <i>LOC100101267</i> | 6.84610359 |
| <i>LOC144097</i>    | 6.25988899 |
| <i>LOC146909</i>    | 7.34065039 |
| <i>LOC162632</i>    | 6.07962479 |
| <i>LOC197322</i>    | 16.4530526 |
| <i>LOC219854</i>    | 6.63573296 |
| <i>LOC400506</i>    | 6.13703113 |
| <i>LPHN1</i>        | 7.65047218 |
| <i>LRP1B</i>        | 10.7411896 |
| <i>LRRC37A3</i>     | 8.1121459  |
| <i>LRRK1</i>        | 11.8296463 |
| <i>LSDP5</i>        | 8.0019745  |
| <i>LSM2</i>         | 7.99112233 |
| <i>LSM3</i>         | 15.3943452 |
| <i>LSM8</i>         | 9.50107994 |
| <i>LTB4DH</i>       | 7.58982336 |
| <i>LYAR</i>         | 17.184239  |



|                  |            |
|------------------|------------|
| <i>LYZL4</i>     | 7.90214614 |
| <i>MAGI1</i>     | 7.57048419 |
| <i>MAP2K5</i>    | 6.47014994 |
| <i>MAP3K3</i>    | 6.09374985 |
| <i>MAP3K7IP1</i> | 6.91463941 |
| <i>MAP7D1</i>    | 15.5521656 |
| <i>MARK2</i>     | 6.11283265 |
| <i>MARS</i>      | 8.31762364 |
| <i>MAST2</i>     | 8.10904827 |
| <i>MAT2A</i>     | 6.24974118 |
| <i>MBP</i>       | 8.35856424 |
| <i>MEAI</i>      | 6.20569891 |
| <i>MED12</i>     | 11.3024734 |
| <i>MED12L</i>    | 12.8606289 |
| <i>MED15</i>     | 12.462116  |
| <i>MED23</i>     | 7.55786068 |
| <i>MED8</i>      | 7.79061511 |
| <i>MEF2C</i>     | 6.40452857 |
| <i>METTL3</i>    | 12.5333599 |
| <i>MFSD8</i>     | 8.53575073 |
| <i>MGC13379</i>  | 8.84676333 |
| <i>MGC32805</i>  | 6.53751322 |
| <i>MGEA5</i>     | 10.2542784 |
| <i>MGRN1</i>     | 8.87562862 |
| <i>MIA3</i>      | 7.24092748 |
| <i>MICAL1</i>    | 8.74800602 |
| <i>MIST</i>      | 8.40227375 |
| <i>MKNK1</i>     | 8.95489628 |
| <i>MKRN2</i>     | 10.8746236 |
| <i>MKX</i>       | 6.57089975 |
| <i>MLL2</i>      | 7.81315466 |
| <i>MMS19</i>     | 7.93220915 |
| <i>MOBK1B</i>    | 10.0634048 |
| <i>MOCS1</i>     | 6.73357331 |
| <i>MORC1</i>     | 10.1664015 |
| <i>MORC2</i>     | 6.38016475 |
| <i>MRPL12</i>    | 7.27659303 |
| <i>MRPL2</i>     | 10.5564891 |
| <i>MRPL52</i>    | 10.7004805 |
| <i>MRPS10</i>    | 7.67084662 |
| <i>MRPS18B</i>   | 7.91579614 |
| <i>MRPS23</i>    | 12.0177173 |
| <i>MS4A8B</i>    | 7.61097588 |
| <i>MSL2L1</i>    | 6.60767594 |
| <i>MST1R</i>     | 7.68371804 |

|                |            |
|----------------|------------|
| <i>MTA2</i>    | 13.5021203 |
| <i>MTFMT</i>   | 13.1554363 |
| <i>MTHFD1L</i> | 8.08820274 |
| <i>MTMR10</i>  | 8.15203721 |
| <i>MTMR11</i>  | 6.54398248 |
| <i>MTRF1L</i>  | 7.1313028  |
| <i>MTRR</i>    | 7.21074261 |
| <i>MUM1</i>    | 9.75662082 |
| <i>MUS81</i>   | 8.93973011 |
| <i>MXI1</i>    | 7.74473551 |
| <i>MYB</i>     | 10.0342463 |
| <i>MYBBP1A</i> | 14.9150074 |
| <i>MYCBP</i>   | 9.26968941 |
| <i>MYH11</i>   | 7.4135926  |
| <i>MYH9</i>    | 6.88051557 |
| <i>MYLC2PL</i> | 8.07744019 |
| <i>MYLIP</i>   | 7.37872579 |
| <i>MYNN</i>    | 7.60224567 |
| <i>MYO1C</i>   | 14.5333104 |
| <i>MYO9B</i>   | 8.33934876 |
| <i>MYRIP</i>   | 12.029172  |
| <i>NAB2</i>    | 6.25578549 |
| <i>NARF</i>    | 6.94500794 |
| <i>NAT5</i>    | 10.8042121 |
| <i>NBEA</i>    | 8.92298158 |
| <i>NBPF7</i>   | 7.63366863 |
| <i>NBR1</i>    | 7.67794366 |
| <i>NCAPD3</i>  | 7.88147963 |
| <i>NCOR1</i>   | 7.80917934 |
| <i>NCOR2</i>   | 11.6117321 |
| <i>NDUFA8</i>  | 6.25247439 |
| <i>NDUFAB1</i> | 14.5654788 |
| <i>NDUFS7</i>  | 10.7415028 |
| <i>NECAP1</i>  | 6.89149166 |
| <i>NEFH</i>    | 8.10510168 |
| <i>NEK3</i>    | 6.52812036 |
| <i>NEK4</i>    | 7.83819737 |
| <i>NET1</i>    | 6.51890847 |
| <i>NF2</i>     | 6.9338704  |
| <i>NFATC1</i>  | 6.45810877 |
| <i>NFE2L1</i>  | 7.36911239 |
| <i>NFIC</i>    | 6.77656803 |
| <i>NFIX</i>    | 6.10061912 |
| <i>NFKB2</i>   | 11.911801  |
| <i>NHN1</i>    | 14.4987875 |

|                                |            |
|--------------------------------|------------|
| <i><b>NIP30</b></i>            | 13.5215042 |
| <i><b>NLE1</b></i>             | 7.90824383 |
| <i><b>NME7</b></i>             | 6.02509471 |
| <i><b>NOC3L</b></i>            | 8.04516843 |
| <i><b>NOL14</b></i>            | 10.1165196 |
| <i><b>NOL5A</b></i>            | 11.7807213 |
| <i><b>NOLC1</b></i>            | 15.8941507 |
| <i><b>NOSIP</b></i>            | 12.3199726 |
| <i><b>NPAS2</b></i>            | 8.71210242 |
| <i><b>NQO1</b></i>             | 8.035266   |
| <i><b>NRAP</b></i>             | 8.22169318 |
| <i><b>NRD1</b></i>             | 6.41001273 |
| <i><b>NSFL1C</b></i>           | 6.41665915 |
| <i><b>NSUN2</b></i>            | 13.0124323 |
| <i><b>NUDT14</b></i>           | 7.33771414 |
| <i><b>NUDT15</b></i>           | 8.57604955 |
| <i><b>NUMA1</b></i>            | 13.4806948 |
| <i><b>NUP210</b></i>           | 9.36446163 |
| <i><b>NUP214</b></i>           | 8.56555186 |
| <i><b>NXF1</b></i>             | 18.0536318 |
| <i><b>NY-SAR-48</b></i>        | 6.8220779  |
| <i><b>OCLAD1</b></i>           | 13.0054725 |
| <i><b>ODF2</b></i>             | 7.5360303  |
| <i><b>ODF2L</b></i>            | 6.89114018 |
| <i><b>OGDH</b></i>             | 6.6110004  |
| <i><b>OGFOD1</b></i>           | 6.64911443 |
| <i><b>ORAI3</b></i>            | 6.60223847 |
| <i><b>OSBP2</b></i>            | 7.83018769 |
| <i><b>OTC</b></i>              | 6.17732541 |
| <i><b>OTUD3</b></i>            | 7.63351495 |
| <i><b>OTUD5</b></i>            | 8.2873896  |
| <i><b>OVOS2</b></i>            | 6.7464022  |
| <i><b>OXA1L</b></i>            | 7.58684632 |
| <i><b>P2RY6</b></i>            | 6.6576954  |
| <i><b>PABPC1</b></i>           | 17.0898496 |
| <i><b>PABPN1</b></i>           | 13.882367  |
| <i><b>PAGE3</b></i>            | 6.07532022 |
| <i><b>PAK4</b></i>             | 6.64695125 |
| <i><b>PALM2-<br/>AKAP2</b></i> | 7.20925138 |
| <i><b>PAQR5</b></i>            | 7.43031784 |
| <i><b>PARP2</b></i>            | 7.33973575 |
| <i><b>PCF11</b></i>            | 10.8408688 |
| <i><b>PCMI</b></i>             | 7.49096431 |
| <i><b>PCSK7</b></i>            | 7.02946869 |

|                |            |
|----------------|------------|
| <i>PDE10A</i>  | 6.11799349 |
| <i>PDE4DIP</i> | 7.98333044 |
| <i>PDE5A</i>   | 6.90291176 |
| <i>PDGFB</i>   | 6.43998108 |
| <i>PDIA5</i>   | 6.32747449 |
| <i>PDILT</i>   | 6.03928701 |
| <i>PDZD2</i>   | 7.14718143 |
| <i>PDZRN4</i>  | 6.80281147 |
| <i>PELP1</i>   | 6.18402018 |
| <i>PET112L</i> | 8.785963   |
| <i>PGAP1</i>   | 6.18544604 |
| <i>PGS1</i>    | 10.5280826 |
| <i>PHF1</i>    | 7.60088775 |
| <i>PHF15</i>   | 6.20351888 |
| <i>PHF19</i>   | 7.9113392  |
| <i>PHF2</i>    | 9.09917983 |
| <i>PHKA2</i>   | 6.85477086 |
| <i>PHLDB1</i>  | 10.6102495 |
| <i>PI4KA</i>   | 6.01170008 |
| <i>PIK3C2B</i> | 6.83550346 |
| <i>PIK3C2G</i> | 6.77662413 |
| <i>PILRB</i>   | 9.86200814 |
| <i>PIP5K1C</i> | 6.76423218 |
| <i>PKN3</i>    | 14.2710508 |
| <i>PLA2G1B</i> | 12.2754799 |
| <i>PLA2G7</i>  | 6.54022845 |
| <i>PLAGL1</i>  | 6.3412048  |
| <i>PLCD1</i>   | 6.13618439 |
| <i>PLCG1</i>   | 8.52239652 |
| <i>PLCH2</i>   | 6.15849754 |
| <i>PLEKHG3</i> | 7.64241278 |
| <i>PLEKHH2</i> | 6.73811037 |
| <i>PLEKHM1</i> | 6.06011198 |
| <i>PLOD1</i>   | 10.4048573 |
| <i>PLRG1</i>   | 13.7476983 |
| <i>PLXNB2</i>  | 10.5196063 |
| <i>PMS1</i>    | 10.1047128 |
| <i>PNN</i>     | 18.3309348 |
| <i>POLDIP2</i> | 7.73199071 |
| <i>POLE</i>    | 15.8844233 |
| <i>POLG2</i>   | 12.8626091 |
| <i>POLH</i>    | 10.9427618 |
| <i>POLL</i>    | 7.22445539 |
| <i>POLR1E</i>  | 7.91051598 |
| <i>POLR2F</i>  | 6.94848426 |

|                  |            |
|------------------|------------|
| <i>POLR3C</i>    | 16.9980907 |
| <i>POMT1</i>     | 7.94279874 |
| <i>POU2F1</i>    | 15.2954032 |
| <i>PPFIA1</i>    | 17.501694  |
| <i>PPIG</i>      | 7.20334515 |
| <i>PPIL1</i>     | 7.52806496 |
| <i>PPIL3</i>     | 6.75937611 |
| <i>PPM1A</i>     | 7.26128831 |
| <i>PPOX</i>      | 8.04168672 |
| <i>PPP2R5C</i>   | 10.1025286 |
| <i>PPP6C</i>     | 6.78963457 |
| <i>PRC1</i>      | 8.2226817  |
| <i>PRDM13</i>    | 7.77576418 |
| <i>PRDX1</i>     | 7.06950997 |
| <i>PREX1</i>     | 6.01126638 |
| <i>PRKCE</i>     | 12.7760772 |
| <i>PRMT5</i>     | 9.22128049 |
| <i>PRNPIP</i>    | 7.92222255 |
| <i>PRPF3</i>     | 6.15161922 |
| <i>PRPF6</i>     | 7.38591862 |
| <i>PSMC5</i>     | 8.14745577 |
| <i>PSMD12</i>    | 18.3880881 |
| <i>PSMD13</i>    | 6.53079721 |
| <i>PSMD5</i>     | 7.00772308 |
| <i>PSPH</i>      | 6.95038163 |
| <i>PTARI</i>     | 6.9988995  |
| <i>PTCD1</i>     | 7.124887   |
| <i>PTGES2</i>    | 6.858876   |
| <i>PTPN11</i>    | 6.20216163 |
| <i>PTPN9</i>     | 7.83044863 |
| <i>PTPRB</i>     | 11.6389099 |
| <i>PTPRU</i>     | 8.78270602 |
| <i>PTRH1</i>     | 8.3834025  |
| <i>PVR</i>       | 6.28257219 |
| <i>QSOX2</i>     | 8.00016205 |
| <i>R3HDM2</i>    | 9.61804923 |
| <i>RAB11FIP3</i> | 7.25431007 |
| <i>RAB31</i>     | 8.93743081 |
| <i>RAB40B</i>    | 7.75906412 |
| <i>RAB5B</i>     | 7.9218267  |
| <i>RAC1</i>      | 13.4672883 |
| <i>RAD1</i>      | 9.70348897 |
| <i>RAI1</i>      | 10.0868275 |
| <i>RALGPS1</i>   | 7.34589275 |
| <i>RANBP3</i>    | 11.0990589 |

|                             |            |
|-----------------------------|------------|
| <i><b>RAPGEF5</b></i>       | 6.6565571  |
| <i><b>RASA3</b></i>         | 9.21731394 |
| <i><b>RASGRP2</b></i>       | 7.42575185 |
| <i><b>RBM10</b></i>         | 7.18033043 |
| <i><b>RBM26</b></i>         | 10.3802509 |
| <i><b>RBM28</b></i>         | 7.01514171 |
| <i><b>RBM35B</b></i>        | 6.85435688 |
| <i><b>RBM45</b></i>         | 12.2860717 |
| <i><b>RBM8A</b></i>         | 18.5786893 |
| <i><b>RDHE2</b></i>         | 9.20912766 |
| <i><b>RECQL5</b></i>        | 10.821508  |
| <i><b>RELN</b></i>          | 6.27766919 |
| <i><b>RER1</b></i>          | 6.82116726 |
| <i><b>RFC4</b></i>          | 7.98538357 |
| <i><b>RFT1</b></i>          | 7.43298783 |
| <i><b>RFTN1</b></i>         | 7.3316778  |
| <i><b>RFX5</b></i>          | 10.6729466 |
| <i><b>RG9MTD3</b></i>       | 8.63827694 |
| <i><b>RGL3</b></i>          | 12.3181335 |
| <i><b>RGPD1</b></i>         | 15.7148564 |
| <i><b>RICH2</b></i>         | 7.53877784 |
| <i><b>RINT1</b></i>         | 7.26365356 |
| <i><b>RIOK1</b></i>         | 8.88814888 |
| <i><b>RIT1</b></i>          | 7.1086682  |
| <i><b>RNASEH2A</b></i>      | 7.71799195 |
| <i><b>RNF10</b></i>         | 10.2217628 |
| <i><b>RNF141</b></i>        | 8.01581017 |
| <i><b>RNF165</b></i>        | 7.35670062 |
| <i><b>RNF167</b></i>        | 9.03295041 |
| <i><b>RNF19B</b></i>        | 8.52442698 |
| <i><b>RNF213</b></i>        | 7.84668908 |
| <i><b>ROBO1</b></i>         | 11.479294  |
| <i><b>RP11-49G10.8</b></i>  | 6.1433751  |
| <i><b>RP11-529I10.4</b></i> | 6.32408894 |
| <i><b>RP4-691N24.1</b></i>  | 6.57180828 |
| <i><b>RPIA</b></i>          | 6.09821603 |
| <i><b>RPL35A</b></i>        | 11.9350152 |
| <i><b>RPL4</b></i>          | 7.23169521 |
| <i><b>RPL9</b></i>          | 15.4070426 |
| <i><b>RPS24</b></i>         | 7.55291529 |
| <i><b>RPS4X</b></i>         | 12.6996634 |
| <i><b>RRBP1</b></i>         | 10.3809621 |
| <i><b>RRP1</b></i>          | 8.84020963 |
| <i><b>RRP12</b></i>         | 8.69050643 |
| <i><b>RRP9</b></i>          | 9.02420667 |

|                         |            |
|-------------------------|------------|
| <i><b>RSPRY1</b></i>    | 6.30279737 |
| <i><b>RSRC2</b></i>     | 10.0638103 |
| <i><b>RSU1</b></i>      | 6.70359129 |
| <i><b>RTN4</b></i>      | 17.5648622 |
| <i><b>RUFY3</b></i>     | 6.31305599 |
| <i><b>RWDD2B</b></i>    | 7.53280401 |
| <i><b>RXRA</b></i>      | 6.22963391 |
| <i><b>SAP30BP</b></i>   | 9.5496474  |
| <i><b>SAPS1</b></i>     | 8.29171414 |
| <i><b>SAPS2</b></i>     | 9.16571385 |
| <i><b>SARIA</b></i>     | 7.16146314 |
| <i><b>SASH1</b></i>     | 8.2822124  |
| <i><b>SBDS</b></i>      | 8.88980078 |
| <i><b>SCIN</b></i>      | 7.20027169 |
| <i><b>SCN8A</b></i>     | 9.12264233 |
| <i><b>SCYL1</b></i>     | 8.67085934 |
| <i><b>SCYL2</b></i>     | 18.1525305 |
| <i><b>SDC2</b></i>      | 8.85167664 |
| <i><b>SDHA</b></i>      | 7.98168441 |
| <i><b>SDHB</b></i>      | 14.693337  |
| <i><b>SEC16A</b></i>    | 9.38600162 |
| <i><b>SEC23A</b></i>    | 16.0044128 |
| <i><b>SEC23B</b></i>    | 8.60948589 |
| <i><b>SEC61A2</b></i>   | 7.48852803 |
| <i><b>SEC63</b></i>     | 6.17689014 |
| <i><b>SEMA6B</b></i>    | 10.6611887 |
| <i><b>SENP3</b></i>     | 6.18340237 |
| <i><b>SERAC1</b></i>    | 6.16314007 |
| <i><b>SERPINB12</b></i> | 10.5474896 |
| <i><b>SF1</b></i>       | 6.20848482 |
| <i><b>SF3A1</b></i>     | 14.5944276 |
| <i><b>SFII</b></i>      | 7.51157955 |
| <i><b>SFRS15</b></i>    | 8.04512549 |
| <i><b>SFRS8</b></i>     | 9.15397473 |
| <i><b>SH3BP1</b></i>    | 11.1779282 |
| <i><b>SH3D19</b></i>    | 16.7589905 |
| <i><b>SH3PXD2B</b></i>  | 6.9275311  |
| <i><b>SH3TC2</b></i>    | 7.37892964 |
| <i><b>SHARPIN</b></i>   | 6.01201173 |
| <i><b>SHROOM1</b></i>   | 11.2847411 |
| <i><b>SIGLEC9</b></i>   | 6.19282326 |
| <i><b>SIL1</b></i>      | 15.9735748 |
| <i><b>SIP1</b></i>      | 13.9983818 |
| <i><b>SIPA1L3</b></i>   | 15.1915803 |
| <i><b>SLC12A6</b></i>   | 16.2079721 |

|                 |            |
|-----------------|------------|
| <i>SLC17A3</i>  | 8.7890919  |
| <i>SLC22A5</i>  | 7.99912726 |
| <i>SLC25A15</i> | 6.51329233 |
| <i>SLC25A16</i> | 6.06110033 |
| <i>SLC25A30</i> | 6.83408095 |
| <i>SLC25A43</i> | 6.42177743 |
| <i>SLC26A6</i>  | 11.3647177 |
| <i>SLC30A6</i>  | 10.4978099 |
| <i>SLC30A7</i>  | 7.27635997 |
| <i>SLC31A1</i>  | 6.62616532 |
| <i>SLC33A1</i>  | 6.55812712 |
| <i>SLC35B1</i>  | 7.25301876 |
| <i>SLC35B4</i>  | 6.17973242 |
| <i>SLC38A2</i>  | 17.157503  |
| <i>SLC43A3</i>  | 16.5483356 |
| <i>SLC44A1</i>  | 8.79220206 |
| <i>SLC45A4</i>  | 6.10573643 |
| <i>SLC5A11</i>  | 6.59412971 |
| <i>SLC5A6</i>   | 9.27231955 |
| <i>SLC9A8</i>   | 14.847079  |
| <i>SLCO1A2</i>  | 9.83524548 |
| <i>SMAD4</i>    | 16.3062861 |
| <i>SMC1A</i>    | 6.54711354 |
| <i>SMC3</i>     | 6.43195933 |
| <i>SMPD4</i>    | 8.99753611 |
| <i>SMS</i>      | 7.17130972 |
| <i>SMUG1</i>    | 7.59425309 |
| <i>SNAPC4</i>   | 7.9235473  |
| <i>SNAPC5</i>   | 9.04300161 |
| <i>SNRK</i>     | 7.70645604 |
| <i>SOBP</i>     | 9.09942132 |
| <i>SORL1</i>    | 6.49632071 |
| <i>SOX13</i>    | 14.1163826 |
| <i>SPATA20</i>  | 6.26821561 |
| <i>SPATA6</i>   | 6.09336883 |
| <i>SPECC1</i>   | 6.03702936 |
| <i>SPEG</i>     | 8.53753209 |
| <i>SPG11</i>    | 6.99592122 |
| <i>SPOP</i>     | 6.1972848  |
| <i>SPTBN1</i>   | 8.06388525 |
| <i>SRA1</i>     | 7.64935408 |
| <i>SRC</i>      | 6.05852928 |
| <i>SRCAP</i>    | 6.18408206 |
| <i>SRRM1</i>    | 8.26726138 |
| <i>SSBP2</i>    | 7.02086411 |



|                 |            |
|-----------------|------------|
| <i>STARD8</i>   | 6.98304735 |
| <i>STAT6</i>    | 6.40165872 |
| <i>STEAP4</i>   | 6.39831095 |
| <i>STIM1</i>    | 6.90977121 |
| <i>STK36</i>    | 12.4029903 |
| <i>STK38L</i>   | 6.25136126 |
| <i>SULF2</i>    | 11.9948041 |
| <i>SULT4A1</i>  | 6.30423672 |
| <i>SUPT16H</i>  | 9.58723035 |
| <i>SUPT6H</i>   | 6.91907447 |
| <i>SUZ12P</i>   | 6.09363845 |
| <i>SYNJ1</i>    | 7.73339865 |
| <i>SYNJ2</i>    | 6.17862858 |
| <i>SYS1</i>     | 8.56668913 |
| <i>SYT15</i>    | 6.69917439 |
| <i>SYT17</i>    | 6.24786257 |
| <i>TAF15</i>    | 7.3621015  |
| <i>TAF3</i>     | 9.50126193 |
| <i>TAF5</i>     | 6.38878748 |
| <i>TAF9</i>     | 7.99143999 |
| <i>TAPBPL</i>   | 6.68737295 |
| <i>TASPI</i>    | 6.90518966 |
| <i>TBC1D8</i>   | 9.81568895 |
| <i>TBC1D9B</i>  | 14.4237086 |
| <i>TBL1Y</i>    | 8.02689216 |
| <i>TBP</i>      | 7.46602492 |
| <i>TCF20</i>    | 6.5542597  |
| <i>TCF3</i>     | 8.27670813 |
| <i>TCP1</i>     | 17.4659282 |
| <i>TEAD3</i>    | 6.58273348 |
| <i>TFAM</i>     | 6.42240934 |
| <i>TFAP2D</i>   | 8.44272472 |
| <i>TFEC</i>     | 8.20812765 |
| <i>TGFA</i>     | 6.95547675 |
| <i>TGFBR2</i>   | 6.26714444 |
| <i>TGFBR3</i>   | 6.43735655 |
| <i>TGFBRAP1</i> | 6.16420097 |
| <i>TGS1</i>     | 6.00589981 |
| <i>THEM4</i>    | 8.17195837 |
| <i>THOC5</i>    | 7.49334418 |
| <i>THUMPD1</i>  | 12.4077506 |
| <i>THUMPD3</i>  | 8.14939385 |
| <i>THYN1</i>    | 8.66867255 |
| <i>TIAM2</i>    | 6.80359991 |
| <i>TJP3</i>     | 8.15112629 |

|                 |            |
|-----------------|------------|
| <i>TLE1</i>     | 6.70917748 |
| <i>TLN2</i>     | 8.3607757  |
| <i>TM2D1</i>    | 7.53003233 |
| <i>TM9SF4</i>   | 8.54380053 |
| <i>TMC7</i>     | 10.2367433 |
| <i>TMEM106B</i> | 7.44360655 |
| <i>TMEM126B</i> | 6.80373629 |
| <i>TMEM135</i>  | 6.6107676  |
| <i>TMEM5</i>    | 13.0128204 |
| <i>TMEM51</i>   | 6.79708111 |
| <i>TMEM67</i>   | 10.6308059 |
| <i>TMEM69</i>   | 6.1200753  |
| <i>TMEM91</i>   | 6.4674454  |
| <i>TMTC1</i>    | 9.21096139 |
| <i>TOMM40L</i>  | 10.9658917 |
| <i>TP73</i>     | 12.3064265 |
| <i>TPM2</i>     | 7.09958819 |
| <i>TPR</i>      | 10.6823106 |
| <i>TPX2</i>     | 6.26210958 |
| <i>TRAPPC6B</i> | 7.0469533  |
| <i>TRDN</i>     | 6.64127589 |
| <i>TRIP10</i>   | 7.19990189 |
| <i>TRIP13</i>   | 7.64993821 |
| <i>TRMT1</i>    | 6.63383537 |
| <i>TRMT6</i>    | 10.6715338 |
| <i>TRMU</i>     | 6.82430399 |
| <i>TROAP</i>    | 6.50639685 |
| <i>TRPT1</i>    | 10.0370931 |
| <i>TRSPAP1</i>  | 10.7053938 |
| <i>TSEN34</i>   | 10.9310429 |
| <i>TSFM</i>     | 8.14668294 |
| <i>TSPAN14</i>  | 9.55597689 |
| <i>TTC12</i>    | 9.97770128 |
| <i>TTC14</i>    | 15.6507219 |
| <i>TTC21B</i>   | 6.51832117 |
| <i>TUBD1</i>    | 9.43268307 |
| <i>TUT1</i>     | 7.5623266  |
| <i>TXNDC6</i>   | 6.36546248 |
| <i>U2AF1</i>    | 6.3415517  |
| <i>UBAC2</i>    | 6.49470416 |
| <i>UBE2I</i>    | 6.69056426 |
| <i>UBE2J2</i>   | 11.0831389 |
| <i>UBE2Z</i>    | 15.4888617 |
| <i>UFM1</i>     | 6.95119821 |
| <i>ULK2</i>     | 7.49734882 |

|                |            |
|----------------|------------|
| <i>UNC13A</i>  | 6.86972467 |
| <i>UNC84B</i>  | 6.62649745 |
| <i>UNK</i>     | 7.35841365 |
| <i>UPF3B</i>   | 8.01304905 |
| <i>USP30</i>   | 6.66580466 |
| <i>USP37</i>   | 7.42220581 |
| <i>USP39</i>   | 7.83972087 |
| <i>USP6</i>    | 6.70078333 |
| <i>USPL1</i>   | 9.51649665 |
| <i>UST</i>     | 7.06136042 |
| <i>VAV1</i>    | 8.97375265 |
| <i>VAV3</i>    | 6.50744467 |
| <i>VEGFA</i>   | 7.99690703 |
| <i>VEZF1</i>   | 11.927135  |
| <i>VPS13B</i>  | 7.11654175 |
| <i>VPS13D</i>  | 6.8386904  |
| <i>VPS33B</i>  | 7.40749726 |
| <i>VPS8</i>    | 6.43252883 |
| <i>VTI1A</i>   | 6.05484059 |
| <i>WBP11</i>   | 6.41654414 |
| <i>WDR18</i>   | 8.72441603 |
| <i>WDR23</i>   | 6.88481791 |
| <i>WDR34</i>   | 6.63851987 |
| <i>WDR4</i>    | 6.17395566 |
| <i>WDR57</i>   | 12.1778145 |
| <i>WDR59</i>   | 6.51459094 |
| <i>WDR61</i>   | 13.0996666 |
| <i>WDR69</i>   | 9.25340774 |
| <i>WHSC1</i>   | 18.2282248 |
| <i>WNT3</i>    | 6.30649581 |
| <i>WNT8A</i>   | 7.60090921 |
| <i>YEATS2</i>  | 6.91610652 |
| <i>ZBTB11</i>  | 7.19050128 |
| <i>ZBTB32</i>  | 11.3732502 |
| <i>ZC3H6</i>   | 7.46472595 |
| <i>ZCCHC2</i>  | 9.61989309 |
| <i>ZCWPW1</i>  | 6.64759385 |
| <i>ZFP90</i>   | 9.55188854 |
| <i>ZKSCAN4</i> | 6.15276777 |
| <i>ZNF146</i>  | 8.16197573 |
| <i>ZNF160</i>  | 8.2990843  |
| <i>ZNF192</i>  | 8.28782385 |
| <i>ZNF236</i>  | 10.3354444 |
| <i>ZNF282</i>  | 7.10431545 |
| <i>ZNF295</i>  | 7.0161297  |

|               |            |
|---------------|------------|
| <b>ZNF330</b> | 7.39178485 |
| <b>ZNF428</b> | 10.2689686 |
| <b>ZNF44</b>  | 9.34923991 |
| <b>ZNF507</b> | 8.16024417 |
| <b>ZNF533</b> | 7.2308206  |
| <b>ZNF553</b> | 7.13436021 |
| <b>ZNF608</b> | 10.131503  |
| <b>ZNF704</b> | 8.17659814 |
| <b>ZNF706</b> | 11.6721363 |
| <b>ZNF76</b>  | 6.81998921 |
| <b>ZNF783</b> | 6.71374931 |
| <b>ZRANB2</b> | 10.5055513 |
| <b>ZWILCH</b> | 8.2179599  |
| <b>ZZEF1</b>  | 6.0143314  |

Supplemental Table 4. List of the genes validated by RT-PCR.

| Gene            | SI    | Transcript E-1/E/E+1 | Transcript E-1/E+1   |
|-----------------|-------|----------------------|----------------------|
| <i>EIF2S2</i>   | 19.17 | decrease             | appearance           |
| <b>RBM8A</b>    | 18.58 | decrease             | appearance           |
| <b>PSMD12</b>   | 18.39 | decrease             | appearance           |
| <i>PNN</i>      | 18.33 | decrease             | appearance           |
| <i>APTX</i>     | 18.26 | decrease             | appearance           |
| <i>WHSC1</i>    | 18.23 | decrease             | <i>no appearance</i> |
| <i>AASDHPPT</i> | 17.96 | decrease             | appearance           |
| <i>DDX17</i>    | 17.85 | <i>weak decrease</i> | <i>no appearance</i> |
| <i>RTN4</i>     | 17.56 | decrease             | appearance           |
| <i>CCT2</i>     | 17.54 | decrease             | appearance           |
| <i>PPF1A1</i>   | 17.50 | decrease             | appearance           |
| <i>TCPI1</i>    | 17.47 | decrease             | appearance           |
| <b>ZRANB2</b>   | 10.51 | decrease             | appearance           |
| <i>RIOK1</i>    | 8.89  | decrease             | appearance           |
| <b>BATI</b>     | 6.43  | decrease             | increase             |
| <b>SFI</b>      | 6.21  | decrease             | increase             |

The table displays the name of the gene (the splicing-related proteins are highlighted in gray), the significance index (SI), and the variation (decrease, increase or appearance) of transcript E-1/E/E+1 or transcript E-1/E+1 observed by RT-PCR. The results obtained by RT-PCR were in agreement with the ExonHit array results, except in three cases (italic).
